# Supplementary material for: A multiresolution spatial parameterization for the estimation of fossil-fuel carbon dioxide emissions via atmospheric inversions
Source: Copernicus journal article supplement (doi:10.5194/gmd-7-1901-2014), 2014-09-03
Supplement: Supplementary file 1 [file gmd-7-1901-2014-supplement.pdf]

Supplement of Geosci. Model Dev., 7, 1901–1918, 2014  
<http://www.geosci-model-dev.net/7/1901/2014/>  
doi:10.5194/gmd-7-1901-2014-supplement  
© Author(s) 2014. CC Attribution 3.0 License.

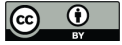

*Supplement of*

## **A multiresolution spatial parameterization for the estimation of fossil-fuel carbon dioxide emissions via atmospheric inversions**

**J. Ray et al.**

*Correspondence to:* J. Ray ([jairay@sandia.gov](mailto:jairay@sandia.gov))

## Supplementary Material

A spatial parameterization for fossil-fuel carbon dioxide emissions

J. Ray, V. Yadav, A. M. Michalak, B. van Bloemen Waanders and S. A. McKenna

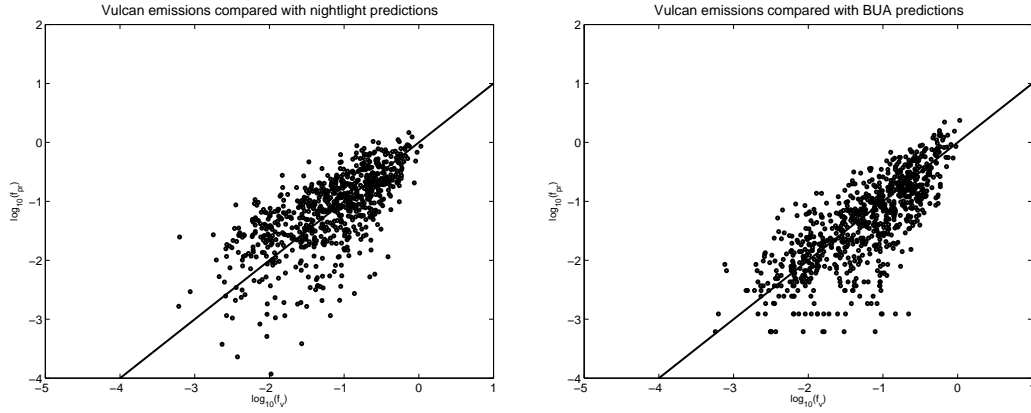

Figure 1: Plots of log-transformed prior emissions  $\mathbf{f}_{pr}$  against annually averaged Vulcan emissions  $\bar{\mathbf{f}}_V$  in  $\mathcal{R}$ . Left: Emissions developed from nightlights. Right: Emissions developed from BUA maps. Note that on a grid-cell basis, the two emissions are not very close. Units of emissions are micromolesof $\text{CM}^{-2}\text{s}^{-1}$ .
